# Supplementary material for: A method for genotype validation and primer assessment in heterozygote-deficient species, as demonstrated in the prosobranch mollusc Hydrobia ulvae
Source: PubMed Central journal article supplement (PMC2536670; doi:10.1186/1471-2156-9-55), 2008-08-19
Supplement: 1471-2156-9-55-S1.pdf [file 1471-2156-9-55-S1.pdf]

**Additional file 1.** Review of heterozygote deficiency in microsatellite studies of marine and freshwater gastropods

| Species                       | Common name              | Reproductive method        | Evidence of selfing? | No. of loci identified | Presence of heterozygote deficient loci (number, if stated) | Suggested cause of heterozygote deficit                                                                                                                                                       | Reference                         | Notes                                                                               |
|-------------------------------|--------------------------|----------------------------|----------------------|------------------------|-------------------------------------------------------------|-----------------------------------------------------------------------------------------------------------------------------------------------------------------------------------------------|-----------------------------------|-------------------------------------------------------------------------------------|
| <i>Biomphalaria pfeifferi</i> | Freshwater snail         | Hermaphroditic             | Yes                  | 9                      | Yes                                                         | Self-fertilisation                                                                                                                                                                            | Charbonnel <i>et al.</i> (2000)   | -                                                                                   |
| <i>Buccinum undatum</i>       | Common whelk             | Separate sexes             | No                   | 5                      | Yes (2/5)                                                   | Null alleles                                                                                                                                                                                  | Weetman <i>et al.</i> (2005)      | Poor primer success (only five loci successful from 38 designed)                    |
| <i>Bulinus forskalii</i>      | African freshwater snail | Hermaphroditic             | Yes                  | 11                     | Yes (11/11)                                                 | High degree of selfing                                                                                                                                                                        | Gow <i>et al.</i> (2001)          | -                                                                                   |
| <i>Bulinus globosus</i>       | Freshwater snail         | Hermaphroditic             | Yes                  | 6                      | Yes (4/6)                                                   | Null alleles (described as unlikely as no there were no consistently failing amplifications at any single loci), population bottleneck effect, and self-fertilisation                         | Emery <i>et al.</i> (2003)        | -                                                                                   |
| <i>Cerithium lividulum</i>    | Needle whelk             | Separate sexes             | No                   | 6                      | Yes (1/6)                                                   | Null alleles (described as unlikely as no there were no consistently failing amplifications at any single loci), population bottleneck effect, and self-fertilisation                         | Emery <i>et al.</i> (2003)        | -                                                                                   |
| <i>Cerithium vulgatum</i>     | Needle whelk             | Separate sexes             | No                   | 6                      | Yes (4/6)                                                   | Population-level processes and small sample sizes                                                                                                                                             | Samadi <i>et al.</i> (2001)       | -                                                                                   |
| <i>Crepidula fornicata</i>    | Slipper limpet           | Protandrous, hermaphrodite | Yes                  | 7                      | Yes                                                         | Null alleles (described as unlikely as observed in multiple populations with variable intensities across the loci), large number of rare alleles and the Wahlund effect                       | Dupont & Viard (2003)             | -                                                                                   |
| <i>Cyclope neritea</i>        | Gastropod mollusc        | Separate sexes             | No                   | 8                      | Yes                                                         | Null alleles due to phylogeographical break in the species' native range                                                                                                                      | Simon-Bouhet <i>et al.</i> (2005) | -                                                                                   |
| <i>Haliotis kamschatkana</i>  | Northern abalone         | Separate sexes             | No                   | 12                     | Yes (6/12)                                                  | Null alleles (described as unlikely due to presence over majority of loci), non-random mating, inbreeding, temporal variation in the genetic composition of recruits, or population admixture | Miller <i>et al.</i> (2001)       | -                                                                                   |
| <i>Haliotis midae</i>         | Perlemoen abalone        | Separate sexes             | No                   | 11                     | Yes (4/11)                                                  | Null alleles                                                                                                                                                                                  | Bester <i>et al.</i> (2004)       | Suffered from allele dropout effect that could not be resolved through optimisation |
| <i>Haliotis rubra</i>         | Black-lip abalone        | Separate sexes             | No                   | 9                      | Yes                                                         | No explanation offered                                                                                                                                                                        | Evans <i>et al.</i> (2000)        |                                                                                     |
| <i>Littorina saxatilis</i>    | Rough periwinkle         | Separate sexes             | No                   | 7                      | Yes                                                         | Null alleles (described as unlikely as did not demonstrate presence of null homozygotes i.e. complete failures), pooling of individuals from several sub-populations (Wahlund effect)         | Sokolov <i>et al.</i> (2002)      | Described large anomalous alleles (500-700 bp)                                      |
| <i>Littorina striata</i>      | Periwinkle               | Separate sexes             | No                   | 5                      | Yes (3/5)                                                   | Null alleles (described as unlikely due to presence over majority of loci), limited sample size and population sub structuring                                                                | Winnepeninckx & Backeljau (1998)  | -                                                                                   |
| <i>Littorina subrotundata</i> | Periwinkle               | Separate sexes             | No                   | 12                     | Yes                                                         | No explanation offered                                                                                                                                                                        | Tie <i>et al.</i> (2000)          | -                                                                                   |
| <i>Lymnaea stagnalis</i>      | Great pond snail         | Hermaphroditic             | Yes                  | 9                      | Yes                                                         | Null alleles                                                                                                                                                                                  | Knott <i>et al.</i> (2003)        | -                                                                                   |
| <i>Lymnaea truncatula</i>     | Dwarf pond snail         | Hermaphroditic             | Yes                  | 9                      | Yes (9/9)                                                   | Bottleneck effect and inbreeding                                                                                                                                                              | Trouve <i>et al.</i> (2000)       | -                                                                                   |
| <i>Melongena corona</i>       | Crown conch              | Separate sexes             | No                   | 8                      | Yes                                                         | Null alleles (described as unlikely as did not demonstrate presence of null homozygotes i.e. complete failures) and template DNA                                                              | Hayes & Karl (2004)               | -                                                                                   |
| <i>Nucella lapillus</i>       | Dog whelk                | Separate sexes             | No                   | 14                     | Yes                                                         | Population subdivision or inbreeding                                                                                                                                                          | Kawai <i>et al.</i> (2001)        | -                                                                                   |
| <i>Physa acuta</i>            | Freshwater snail         | Hermaphroditic             | Yes                  | 7                      | Yes                                                         | Null alleles (described as unlikely due to nature of target species and consistent heterozygote deficit over multiple localities and loci)                                                    | Monsutti & Perrin (1999)          | -                                                                                   |
