# Supplementary material for: A method for genotype validation and primer assessment in heterozygote-deficient species, as demonstrated in the prosobranch mollusc Hydrobia ulvae
Source: PubMed Central journal article supplement (PMC2536670; doi:10.1186/1471-2156-9-55), 2008-08-19
Supplement: 1471-2156-9-55-S4.pdf [file 1471-2156-9-55-S4.pdf]

**Additional file 4.** Comparison of microsatellite genotyping data using two primer sets (A and B) for *Hydrobia ulvae*

| Locus          | Primer set | $H_E - H_O$ | Deviation from HWE | P-value of deviation from HWE | MICROCHECKER explanation of results                                                                                                                                                                                                                                               | Predicted null allele frequency | Proportion of matching genotypes (%) | Potentially unreliable locus? |
|----------------|------------|-------------|--------------------|-------------------------------|-----------------------------------------------------------------------------------------------------------------------------------------------------------------------------------------------------------------------------------------------------------------------------------|---------------------------------|--------------------------------------|-------------------------------|
| <i>Hulv-01</i> | A          | 0.19        | Yes                | <0.001**                      | Analysis indicates homozygote excess at this locus.<br>No evidence for scoring error due to stuttering.<br>No evidence for large allele dropout.<br>Null alleles may be present at this locus, as is suggested by the general excess of homozygotes for most allele size classes. | 0.12                            | 38/40 (95%)                          | Yes                           |
|                | B          | 0.20        | Yes                | <0.001**                      | (see <i>Hulv-01_set A</i> )                                                                                                                                                                                                                                                       | 0.14                            |                                      |                               |
| <i>Hulv-03</i> | A          | 0.30        | Yes                | <0.001**                      | (see <i>Hulv-01_set A</i> )                                                                                                                                                                                                                                                       | 0.20                            | 46/46 (100%)                         | Yes                           |
|                | B          | 0.30        | Yes                | <0.001**                      | (see <i>Hulv-01_set A</i> )                                                                                                                                                                                                                                                       | 0.20                            |                                      |                               |
| <i>Hulv-04</i> | A          | -0.01       | No                 | 0.738                         | No evidence for scoring error due to stuttering.<br>No evidence for large allele dropout.<br>No evidence for null alleles.                                                                                                                                                        | -0.01                           | 47/47 (100%)                         | Yes                           |
|                | B          | -0.01       | No                 | 0.852                         | As for <i>Hulv-04_set A</i>                                                                                                                                                                                                                                                       | -0.01                           |                                      |                               |
| <i>Hulv-05</i> | A          | 0.36        | Yes                | <0.001**                      | (see <i>Hulv-01_set A</i> )                                                                                                                                                                                                                                                       | 0.24                            | 43/44 (98%)                          | Yes                           |
|                | B          | 0.34        | Yes                | <0.001**                      | (see <i>Hulv-01_set A</i> )                                                                                                                                                                                                                                                       | 0.22                            |                                      |                               |
| <i>Hulv-06</i> | A          | 0.73        | Yes                | <0.001**                      | (see <i>Hulv-01_set A</i> )                                                                                                                                                                                                                                                       | 0.64                            | 0/40 (0%)                            | No                            |
|                | B          | 0.61        | Yes                | <0.001**                      | (see <i>Hulv-01_set A</i> )                                                                                                                                                                                                                                                       | 0.48                            |                                      |                               |
| <i>Hulv-07</i> | A          | 0.56        | Yes                | <0.001**                      | (see <i>Hulv-01_set A</i> )                                                                                                                                                                                                                                                       | 0.42                            | 8/34 (24%)                           | No                            |
|                | B          | 0.83        | Yes                | <0.001**                      | (see <i>Hulv-01_set A</i> )                                                                                                                                                                                                                                                       | 0.78                            |                                      |                               |

$H_O$ , observed heterozygosity;  $H_E$ , expected heterozygosity; HWE, Hardy-Weinberg equilibrium.

\*\*Locus deviates significantly from Hardy-Weinberg equilibrium ( $p < 0.01$ ), estimated using GENEPOP v3.4 [25].
